# Supplementary material
Source: publisher site journal article supplement (https://www.dovepress.com/article/436128)
Supplement: Supplementary file 1 [file get_supplementary_file.php]

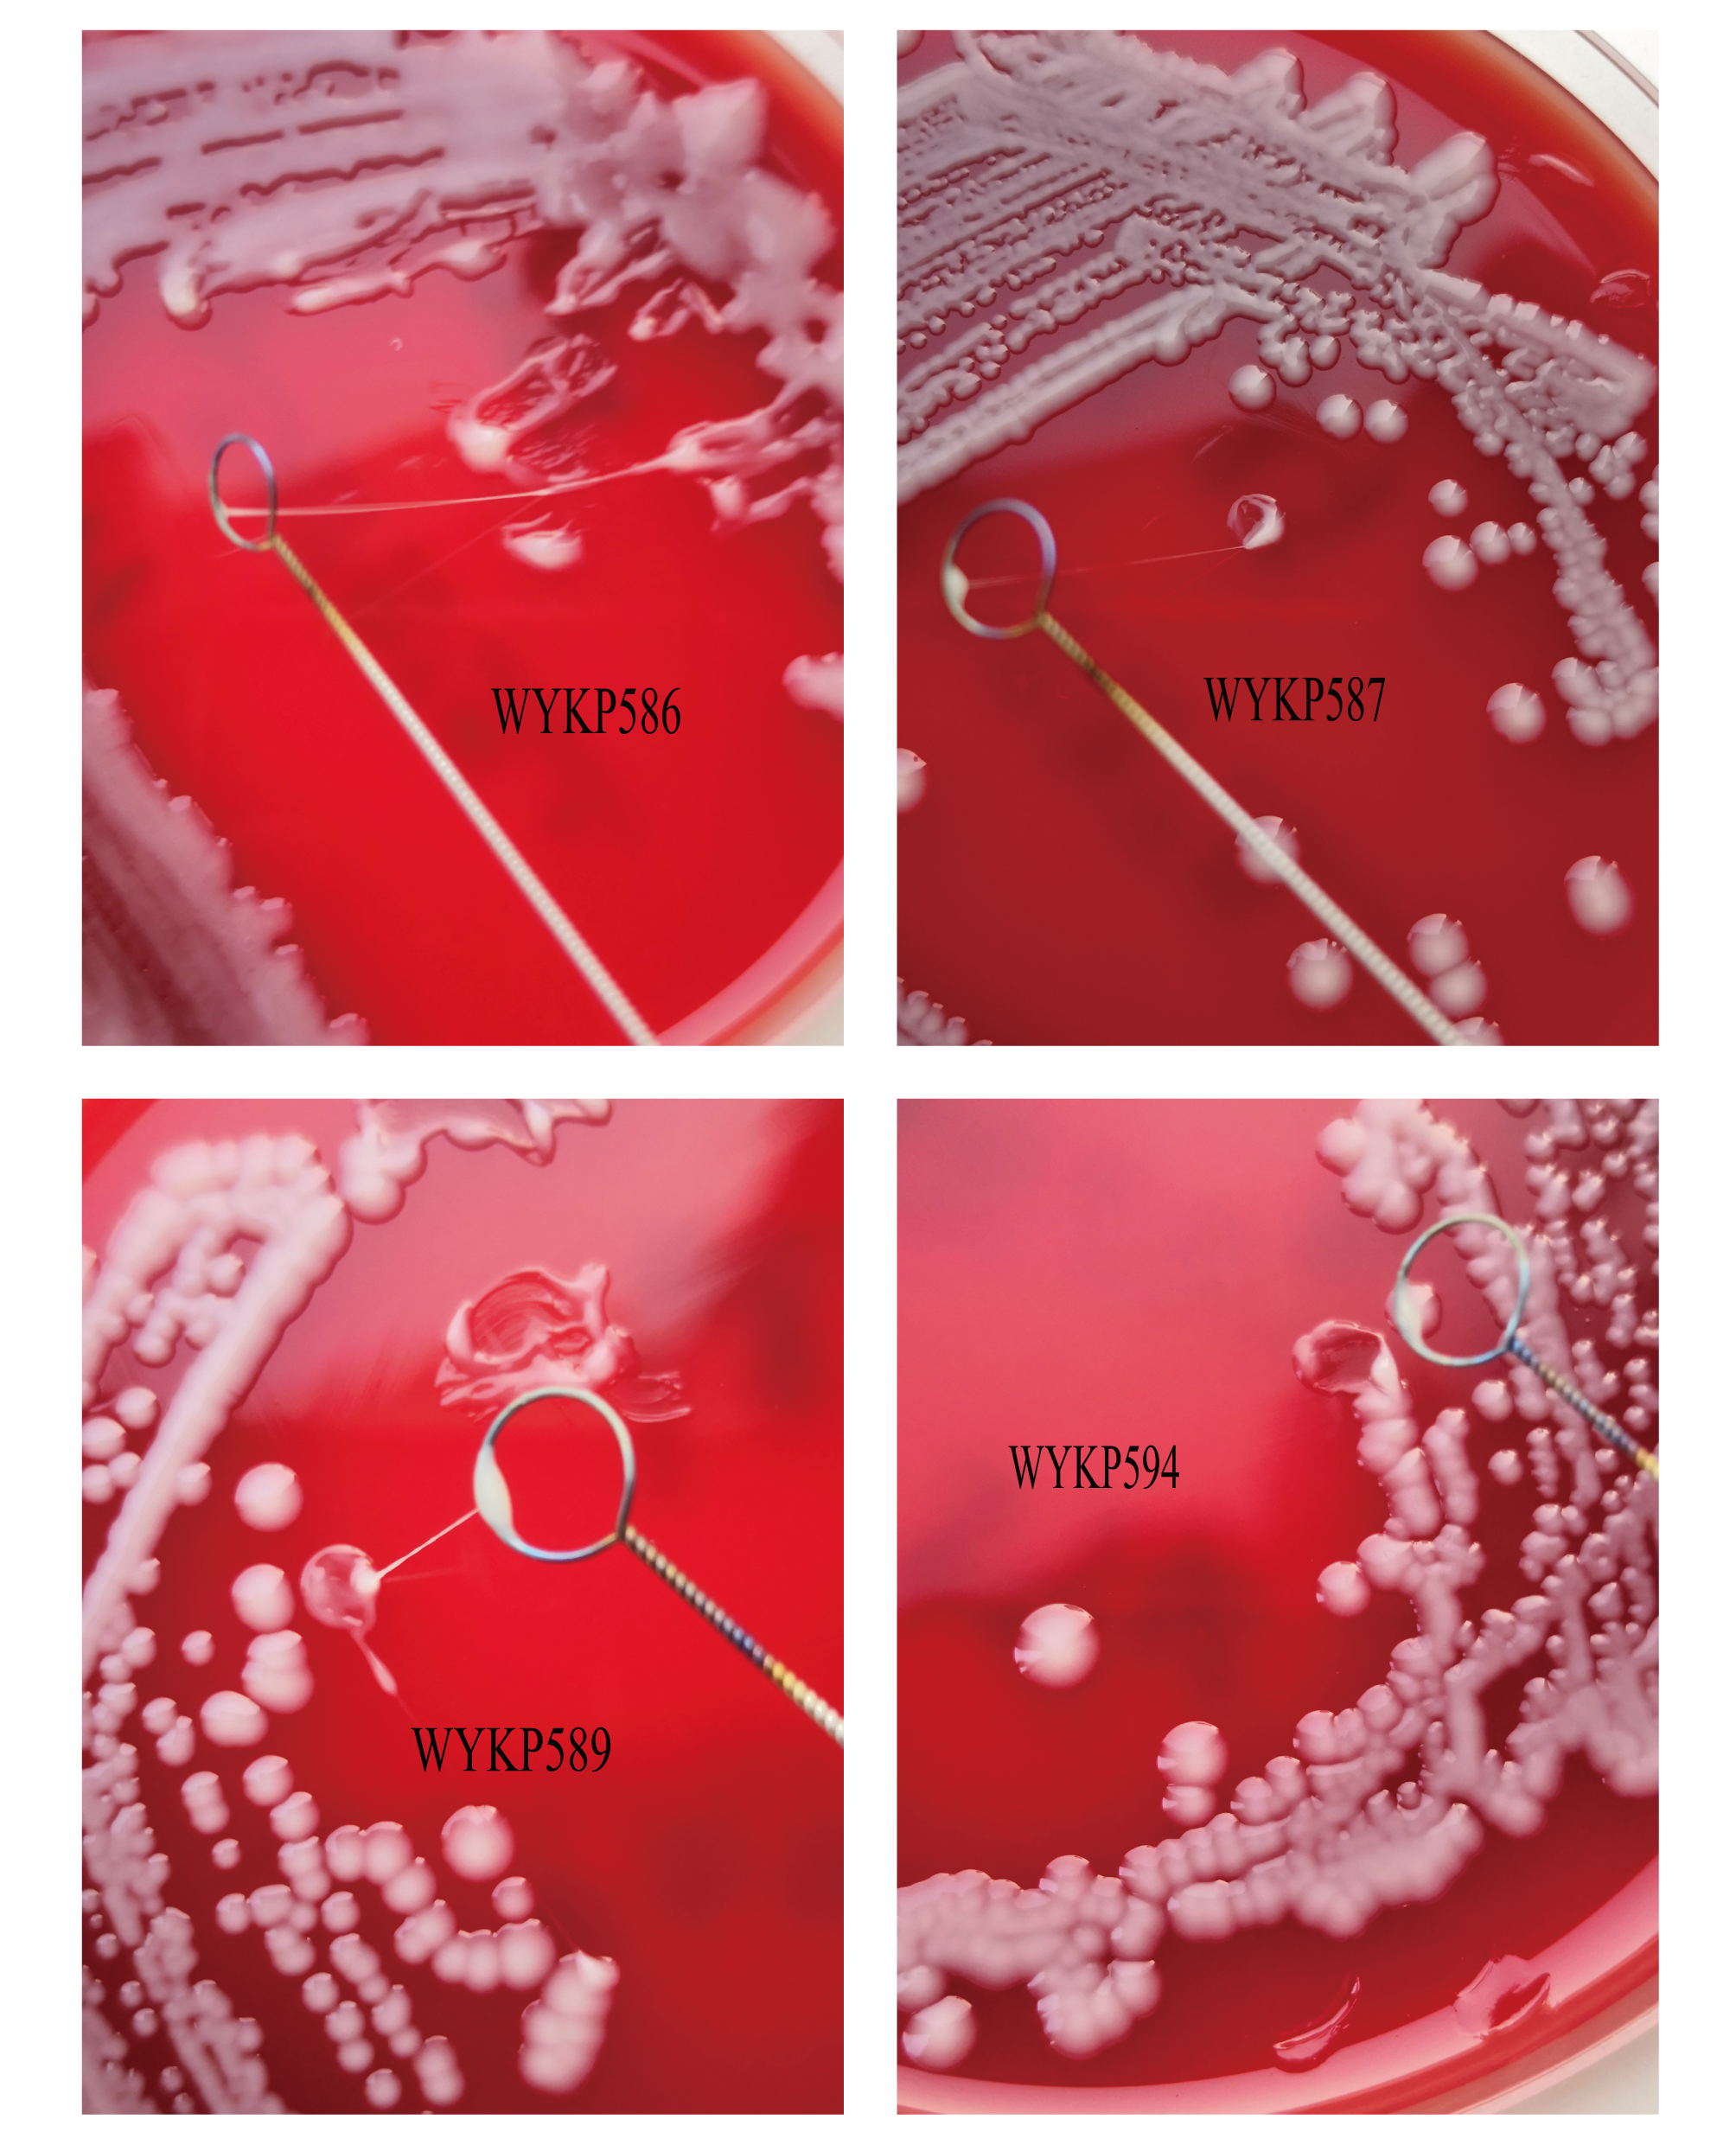


**Figure S1** String test of four hv-CRKP strains from the same patient at different periods.


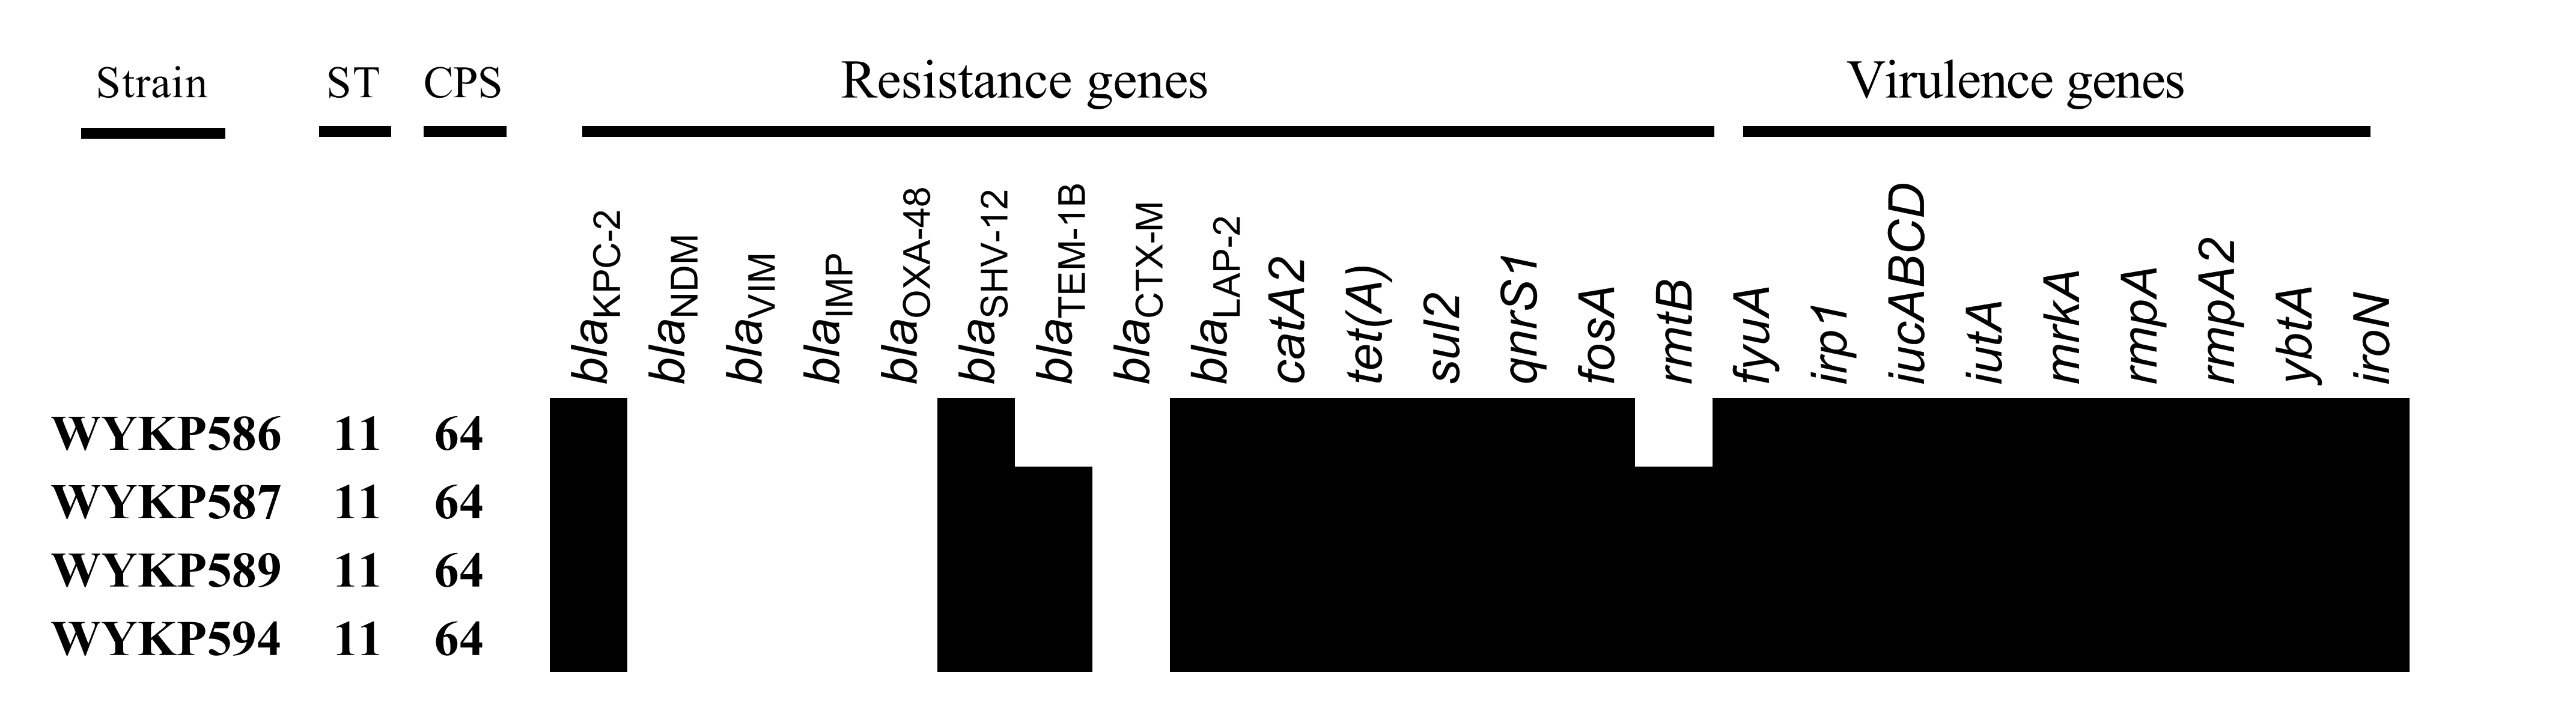


**Figure S2**  The virulence genes, antimicrobial resistance genes, capsule serotype genes and MLST types of four hv-CRKP isolates from the same patient in different periods.

Note: Black indicates presence of a gene in the corresponding strain. Only the major virulence genes on the chromosomes are listed. The complete information is provided in Table S1 of the Supplementary Material.


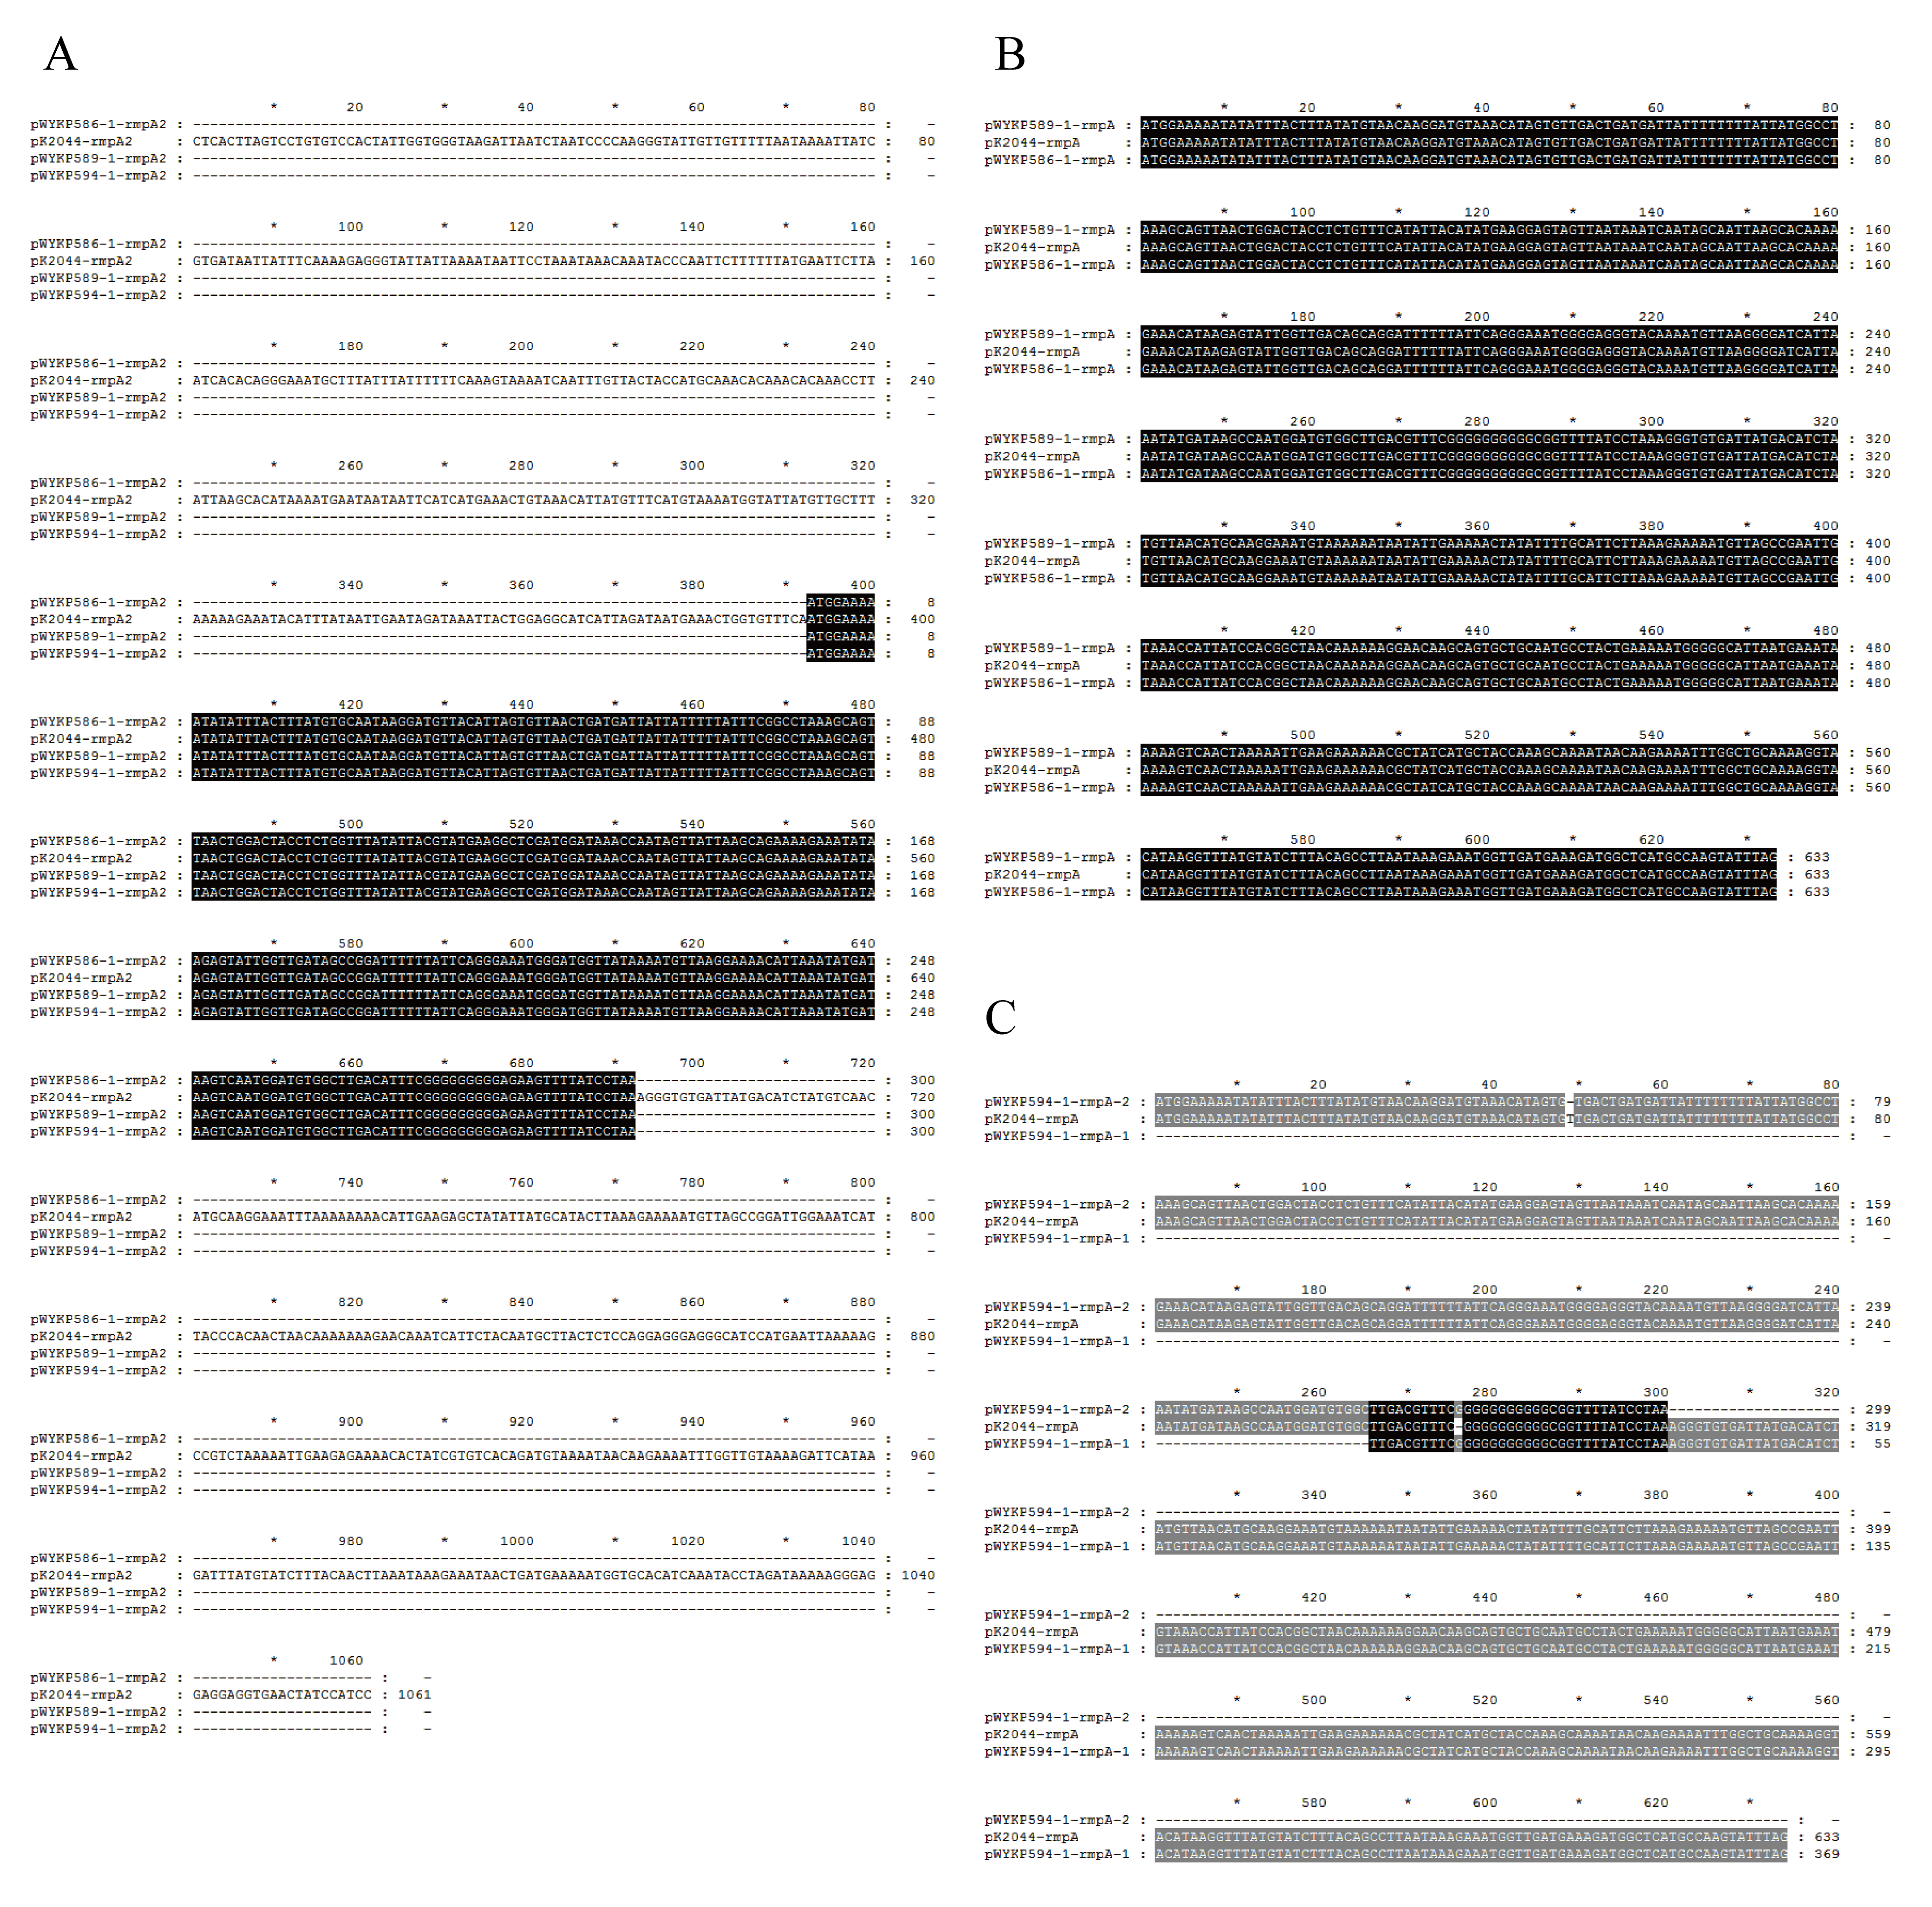


**Figure S3** Comparison of virulence genes *rmpA2* and *rmpA* on different plasmids. (A) Alignment of virulence genes *rmpA2* on plasmids pWYKP586-1, pWYKP589-1, pWYKP594-1, and pK2044(AP006726). (B) Alignment of virulence genes *rmpA* on plasmids pWYKP586-1, pWYKP589-1, and pK2044(AP006726). (C) Alignment of virulence genes *rmpA* on plasmids pWYKP594-1 and pK2044(AP006726). Gene sequence alignment was performed using MEGA-X. The gene comparison map was generated with GeneDoc.

**Table S1** Genomic characteristics of the plasmids and chromosomes in WYKP586, WYKP589, and WYKP594.

| Sequence name | Genome size  (bp) | Incapability group | Mobial ability | Resistance genes | Virulence genes |
| --- | --- | --- | --- | --- | --- |
| WYKP586-chr | 5460052 | n | Non-mobilizable | n | *wcaJ / wzm / wzt / wbbM / glf / wbbN / wbbO / fyuA / ybtE / ybtT / ybtU / irp1 / irp2 / ybtA / ybtP / ybtQ / ybtX / ybtS* |
| pWYKP586-1 | 302246 | IncHI1B,repB | Conjugative(oriT, T4CP, T4SS, Relaxase) | *CatA2/sul2/tet(A)/bla*LAP-2 */ qnrS1* | *rmpA2 / rmpA/*  *iucABCD / iutA/iroN* |
| pWYKP586-2 | 110449 | IncFII,IncR | Non-mobilizable(T4SS) | *blaSHV-12 / blaKPC-2* | n |
| pWYKP586-3 | 11970 | CoIRNAI | Non-mobilizable(T4CP, Relaxase) | n | n |
| pWYKP586-4 | 5596 | CoIRNAI | Mobilizable(oriT, Relaxase) | n | n |
| WYKP589-chr | 5465951 | n | Non-mobilizable | n | *wcaJ / wzm / wzt / wbbM / glf / wbbN / wbbO / fyuA / ybtE / ybtT / ybtU / irp1 / irp2 / ybtA / ybtP / ybtQ / ybtX / ybtS* |
| pWYKP589-1 | 217869 | IncHI1B,repB | Mobilizable(oriT, T4CP) | n | *rmpA2 /rmpA/*  *iucABCD / iutA/* *iroN* |
| pWYKP589-2 | 110599 | IncFII,IncR | Non-mobilizable(T4SS) | *bla*SHV-12 */ bla*KPC-2 */ rmtB /* *bla*TEM-1B | n |
| pWYKP589-3 | 83551 | n | Conjugative(oriT, T4CP, T4SS, Relaxase) | *CatA2 / sul2 / tet(A) / bla*LAP-2 */ qnrS1* | n |
| pWYKP589-4 | 11970 | CoIRNAI | Non-mobilizable(Relaxase) | n | n |
| pWYKP589-5 | 5596 | CoIRNAI | Mobilizable(oriT, Relaxase) | n | n |
| WYKP594-chr | 5466795 | n | Non-mobilizable | n | *wcaJ / wzm / wzt / wbbM / glf / wbbN / wbbO / fyuA / ybtE / ybtT / ybtU / irp1 / irp2 / ybtA / ybtP / ybtQ / ybtX / ybtS* |
| pWYKP594-1 | 217743 | IncHI1B,repB | Mobilizable(oriT, T4CP) | n | *rmpA2 / rmpA/*  *iucABCD / iutA/ iroN* |
| pWYKP594-2 | 83551 | n | Conjugative(oriT, T4CP, T4SS, Relaxase) | *CatA2 / sul2/ tet(A) / bla*LAP-2 */ qnrS1* | n |
| pWYKP594-3 | 73344 | CoIRNAI,IncR | Conjugative(oriT, T4CP, T4SS, Relaxase) | *bla*KPC-2 | n |
| pWYKP594-4 | 50524 | IncFII | Non-mobilizable | *bla*SHV-12 */ rmtB / bla*TEM-1B | n |
| pWYKP594-5 | 5596 | CoIRNAI | Mobilizable(oriT, Relaxase) | n | n |

**Note:** n, nonexistent information.
